# Supplementary material
Source: publisher site journal article supplement (https://www.degruyterbrill.com/publication/isbn/9783050049601/downloadAsset/9783050049601_Abbildungen.zip)
Supplement: Supplementary file 1 [file 3-05-004399_auftakt01.pdf › 3-05-004399_auftakt01.pdf]

# 1 Epochenbegriff und Forschungsperspektiven

---

---

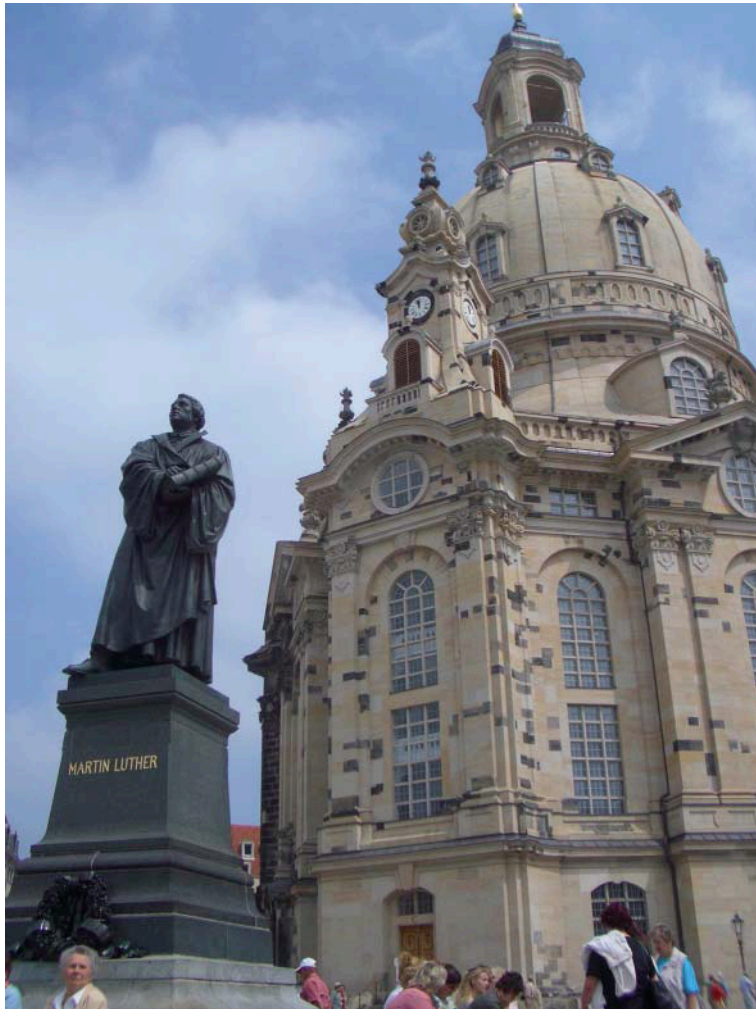

*Abbildung 1: Lutherdenkmal vor der Frauenkirche Dresden (Fotografie, 2007)*
