# Supplementary material
Source: publisher site journal article supplement (https://www.degruyterbrill.com/publication/isbn/9783050049601/downloadAsset/9783050049601_Abbildungen.zip)
Supplement: Supplementary file 2 [file 3-05-004399_auftakt02.pdf › 3-05-004399_auftakt02.pdf]

## 2 Archiv und Autopsie

---

---

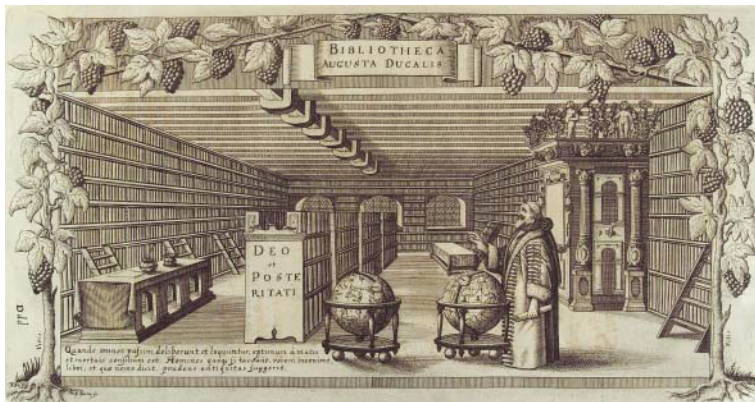

Abbildung 2: Conrad Buno: Herzog August von Braunschweig-Lüneburg (1579–1666) in seiner Bibliothek (1650)
