# Supplementary material
Source: publisher site journal article supplement (https://www.degruyterbrill.com/publication/isbn/9783050049601/downloadAsset/9783050049601_Abbildungen.zip)
Supplement: Supplementary file 3 [file 3-05-004399_auftakt03.pdf › 3-05-004399_auftakt03.pdf]

### 3 Poetik und Literaturbegriff

---

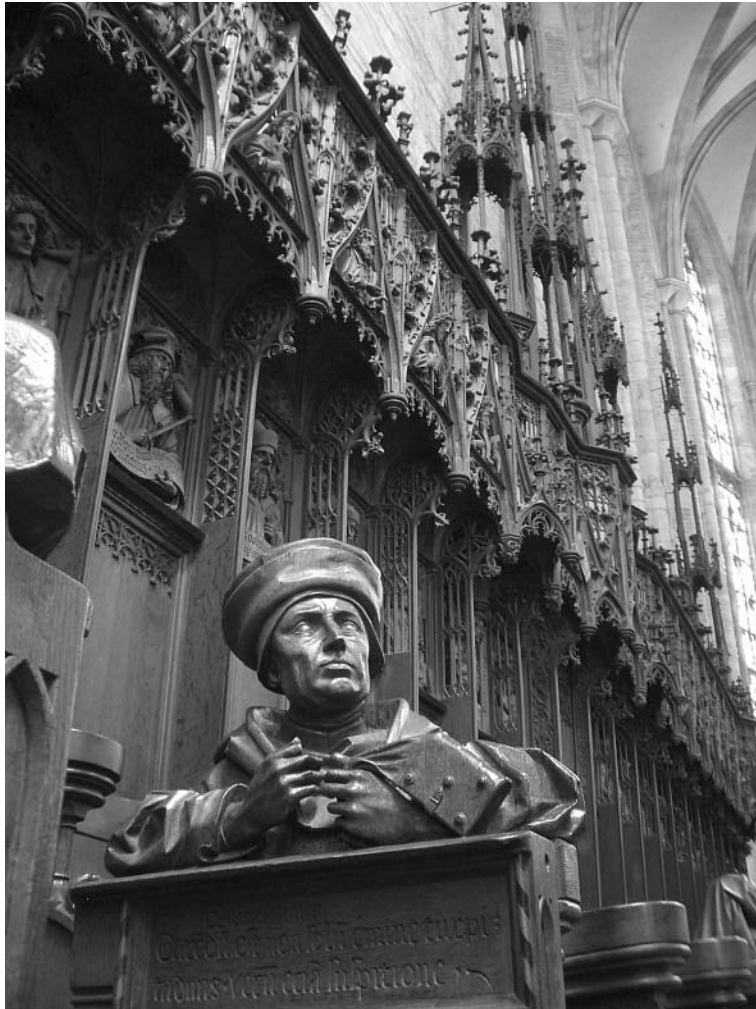

Abbildung 4: Quintilian. Pultbüste im Chorgestühl des Ulmer Münsters (Fotografie, 2008)
