# Supplementary material
Source: publisher site journal article supplement (https://www.degruyterbrill.com/publication/isbn/9783050049601/downloadAsset/9783050049601_Abbildungen.zip)
Supplement: Supplementary file 5 [file 3-05-004399_auftakt05.pdf › 3-05-004399_auftakt05.pdf]

## 5 Poetische Optionen: Bild, Sprache und Stil

---

---

### DECAS EMBLEMATUM SACRORUM.

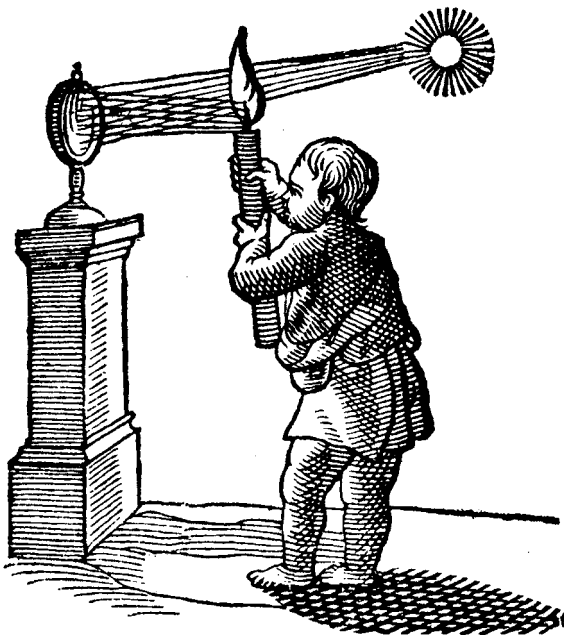

*Cernis, ut è speculo radioso flamma resultat,  
Quæ multorum oculos attrahit atq; capit:  
Pictura est speculum, Lux aurea clara Poësis:  
His simul artigenus deliciatur amor.*

Abbildung 6: Georg Philipp Harsdörffer: Brennglas-Emblem aus dem *Poetischen Trichter* (1648–53)
