# Supplementary material
Source: publisher site journal article supplement (https://www.degruyterbrill.com/publication/isbn/9783050049601/downloadAsset/9783050049601_Abbildungen.zip)
Supplement: Supplementary file 7 [file 3-05-004399_auftakt07.pdf › 3-05-004399_auftakt07.pdf]

## 7 Diskurse und Textsorten

GEHÖRT UND GESEHEN.

Auf dem vierten/der viel größter als die andern war/sahen sie

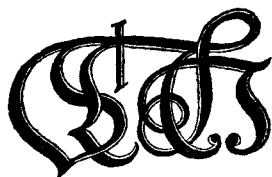

Und sagte die Schrift des Kürbß:

Wann ich auch bin halb geschrunden /

Werden diese Liebeszeichen /

Welche Zughuld verbunden /

Nie von meiner Härte weichen.

Nach diesem schwang sich das Gerüchte wieder in die Höhe / ergriff die Trompeten und versprache / solche / als einen Preis aufzuwerfen und dem zu überreichen / welcher unter ihnen beyden das schicklichste Gedicht von gedachten Herren herstammenden Hochzeitern und Hochzeiterrinnen zu Ehren werde hören lassen.

Sie erinnerten sich / daß solches Theil ihre Pflichtschuldigkeit erforderte / theils die hohe Gunstgewogenheit / welche obberührte Herren und anjeho getraute liebe Angehörige zu ihren Liedern tragen.

Nachdem sie dem Gerüchte gebührliche Ehrerbietung erwiesen / sagten sie sich unter den nächsten Baum / und sieng Strefen an also zu fragen:

Was ist die Lieb'?

Klaj. — — — — ein ungeheure Blut /

Die glimmt und flammt in jedem jungen Blut.

Was ist die Lieb'?

— — — — Stref. Ein brünstiges Verlangen /

In Gegenhuld die Liebste zu umfassen,

Dieses ist  
abgeschet  
auf dem  
Tasso und  
Lope de  
Vega Ar-  
cadia f.  
312. Oyd  
la des-  
nacion de

Was Amor,  
del, &c.

Abbildung 8: Georg Philipp Harsdörffer/Sigmund von Birken/Johann Klaj: Pegnesisches Schäfergedicht (1644). Beispielseite
