# Supplementary material
Source: publisher site journal article supplement (https://www.degruyterbrill.com/publication/isbn/9783050049601/downloadAsset/9783050049601_Abbildungen.zip)
Supplement: Supplementary file 8 [file 3-05-004399_auftakt08.pdf › 3-05-004399_auftakt08.pdf]

## 8 Medien und literarische Institutionen

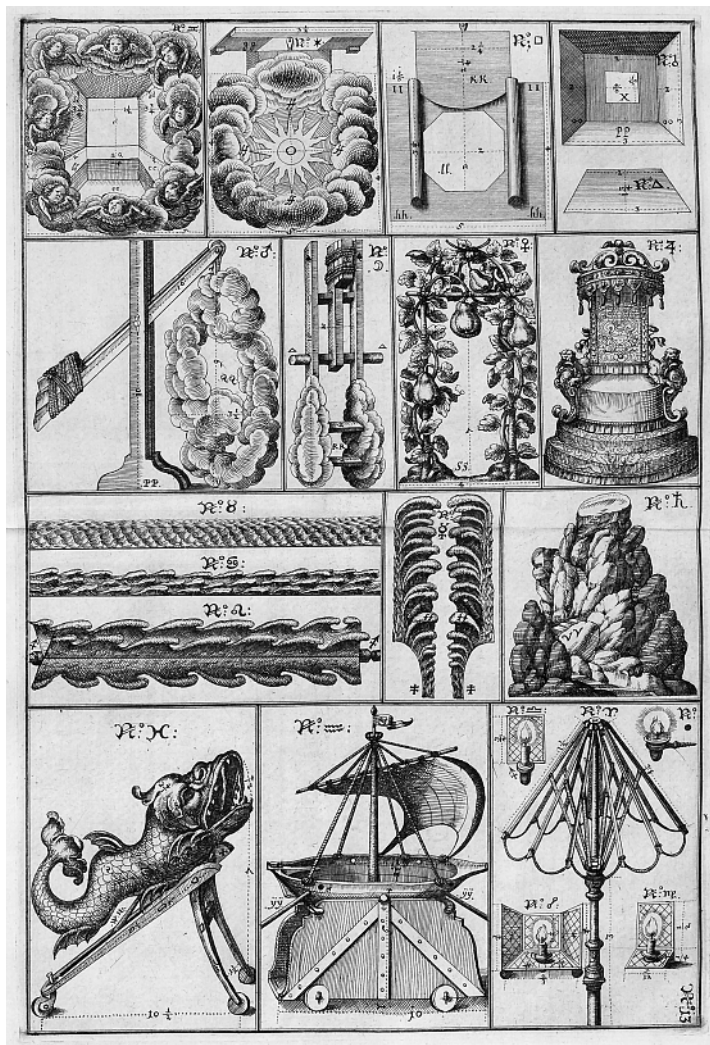

Abbildung 9: Theatermaschinen aus Joseph Furtenbachs *Mannhafter Kunst=Spiegel* (1663)
