# Supplementary material
Source: publisher site journal article supplement (https://www.degruyterbrill.com/publication/isbn/9783050049601/downloadAsset/9783050049601_Abbildungen.zip)
Supplement: Supplementary file 10 [file 3-05-004399_auftakt10.pdf › 3-05-004399_auftakt10.pdf]

## 10 Religion und Religiosität

---

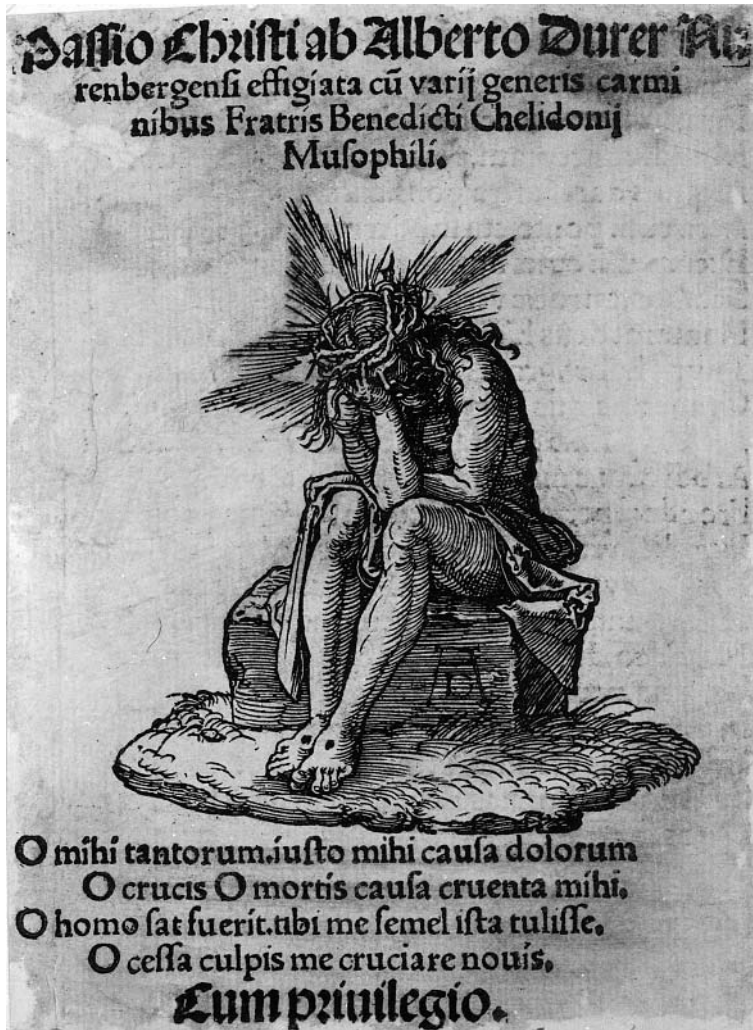

Abbildung 11: Albrecht Dürer: *Kleine Passion*, Titel: *Christus im Elend*. Holzschnitt (1511)
