# Supplementary material
Source: publisher site journal article supplement (https://www.degruyterbrill.com/publication/isbn/9783050049601/downloadAsset/9783050049601_Abbildungen.zip)
Supplement: Supplementary file 11 [file 3-05-004399_auftakt11.pdf › 3-05-004399_auftakt11.pdf]

## 11 Subjekt, Macht und Krieg

---

---

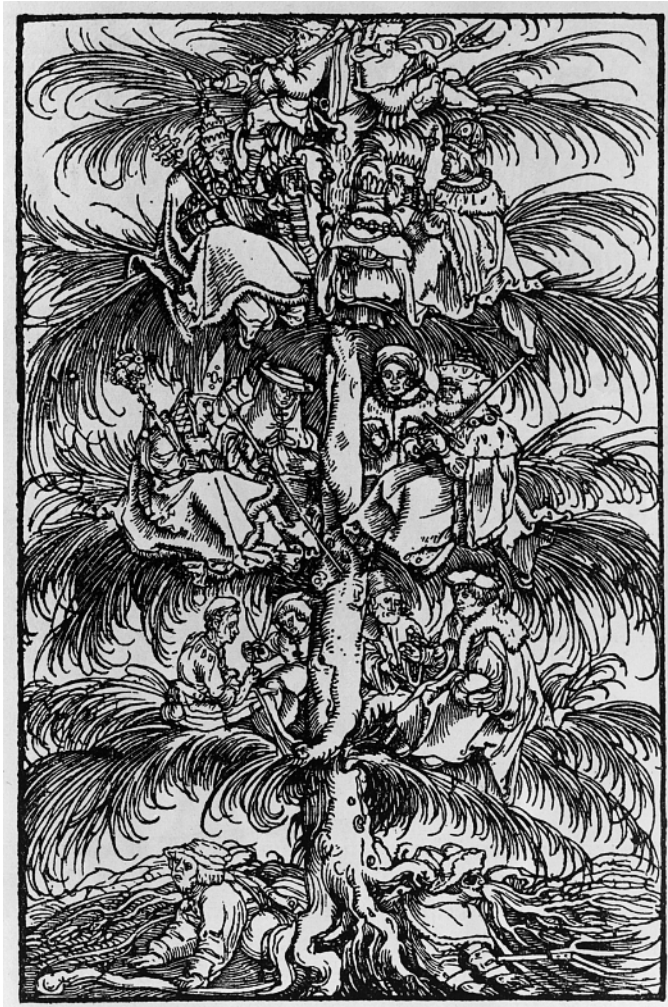

Abbildung 12: Ständebaum – der Versuch der Bauern, sich mit Keule und Forke über Papst und Kaiser emporzukämpfen (1532)
