# Supplementary material
Source: publisher site journal article supplement (https://www.degruyterbrill.com/publication/isbn/9783050049601/downloadAsset/9783050049601_Abbildungen.zip)
Supplement: Supplementary file 12 [file 3-05-004399_auftakt12.pdf › 3-05-004399_auftakt12.pdf]

## 12 Raum, Zeit und Geschichte

---

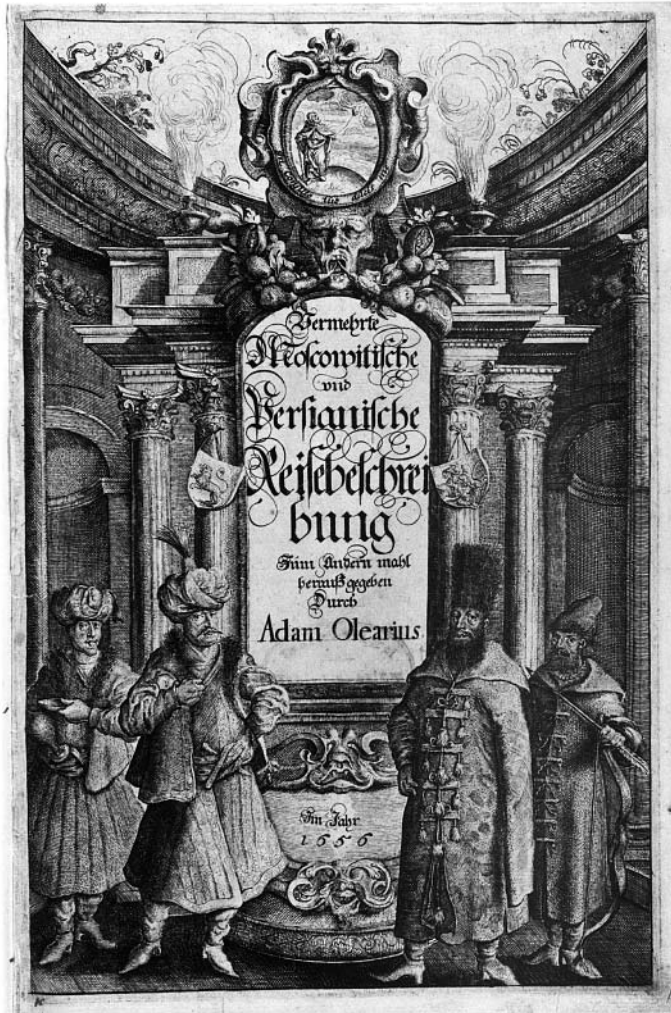

Abbildung 13: Adam Olearius: *Reisebeschreibung. Vermehrte Moscovitische und Persianische Reisebeschreibung* (2. Auflage 1656). Titelpuffer
