# Supplementary material
Source: publisher site journal article supplement (https://www.degruyterbrill.com/publication/isbn/9783050049601/downloadAsset/9783050049601_Abbildungen.zip)
Supplement: Supplementary file 13 [file 3-05-004399_auftakt13.pdf › 3-05-004399_auftakt13.pdf]

### 13 Naturerfahrung und Naturbegriff

---

---

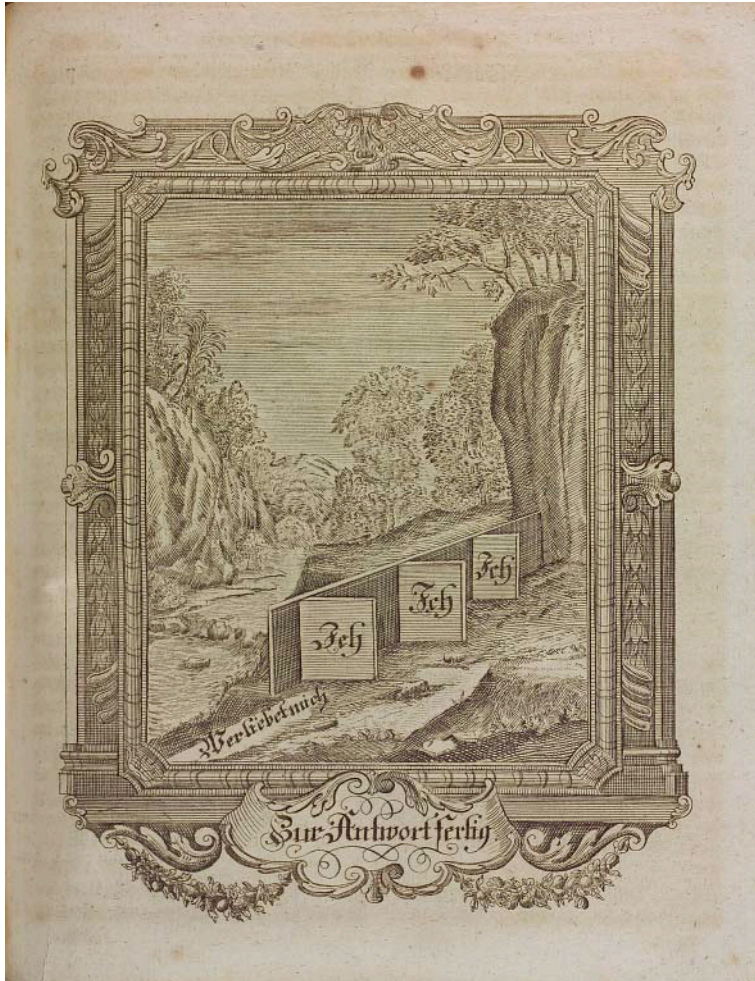

Abbildung 14: Johann Arndt: *Paradies-Gärtlein aller Tugenden*. Titelbild: Echofelsen (1612)
