# Supplementary material
Source: publisher site journal article supplement (https://www.degruyterbrill.com/publication/isbn/9783050049601/downloadAsset/9783050049601_Abbildungen.zip)
Supplement: Supplementary file 14 [file 3-05-004399_auftakt14.pdf › 3-05-004399_auftakt14.pdf]

## 14 Rezeption und Interpretation

---

---

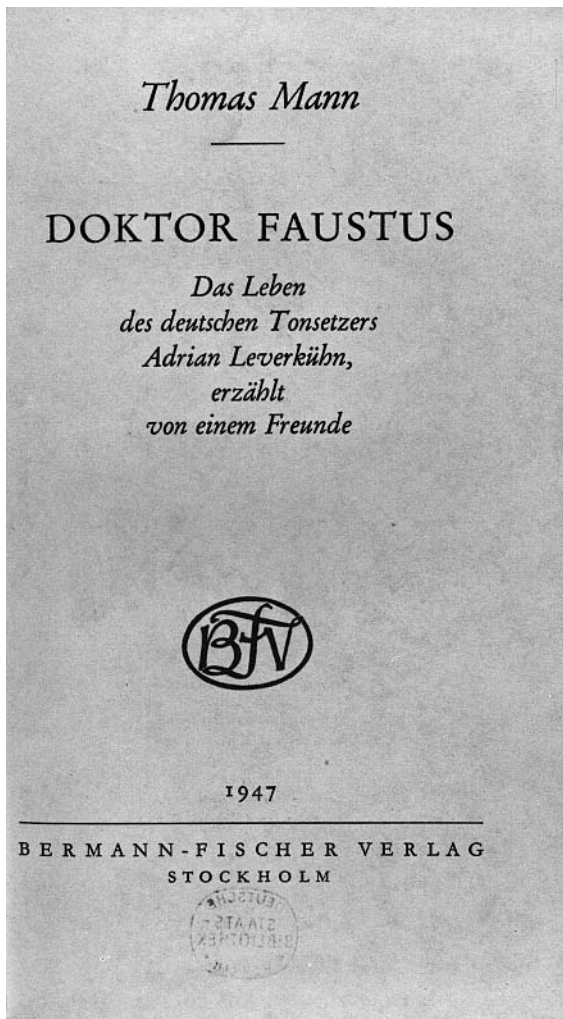

Abbildung 15: Thomas Mann: *Doktor Faustus*. Titelblatt der Erstausgabe (1947)
