# Supplementary material
Source: publisher site journal article supplement (https://www.degruyterbrill.com/publication/isbn/9783050049601/downloadAsset/9783050049601_Abbildungen.zip)

---

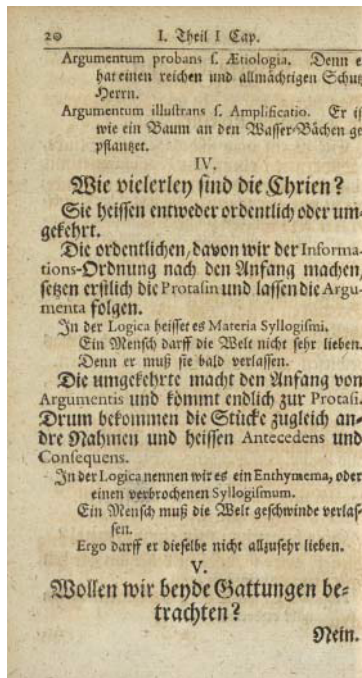

49

Supplement: Supplementary file 4 [file 3-05-004399_auftakt04.pdf › 3-05-004399_auftakt04.pdf]

## 6 Autorbegriff und Autortypen

---

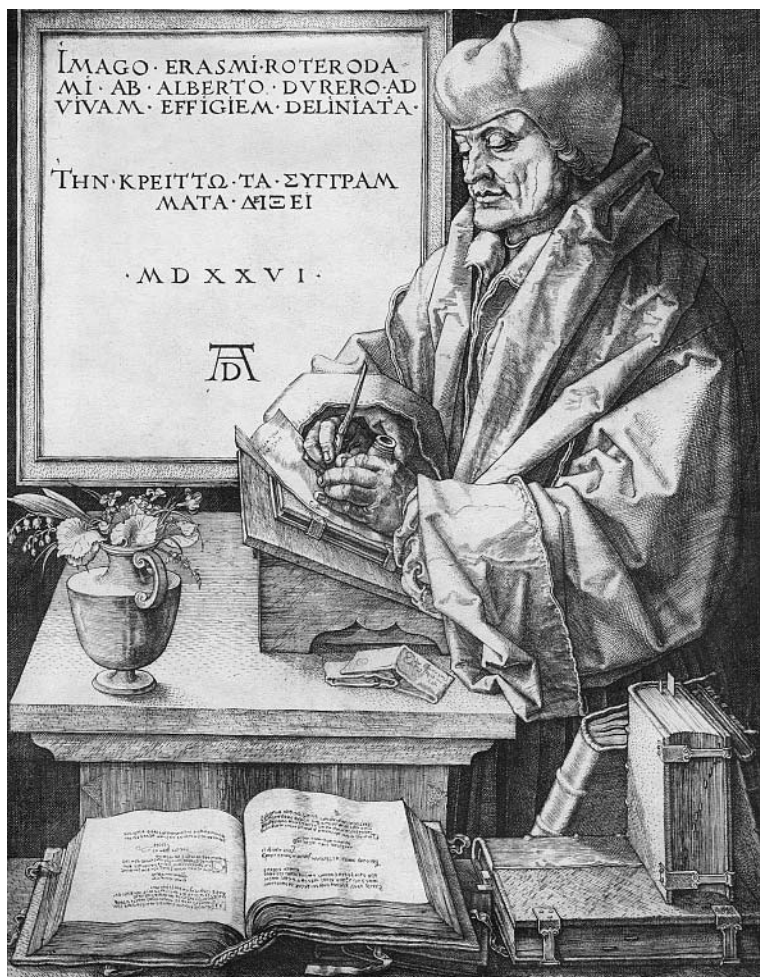

Abbildung 7: Albrecht Dürer: *Erasmus von Rotterdam* (1526)

Supplement: Supplementary file 6 [file 3-05-004399_auftakt06.pdf › 3-05-004399_auftakt06.pdf]

---

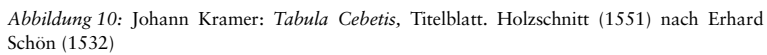

Supplement: Supplementary file 9 [file 3-05-004399_auftakt09.pdf › 3-05-004399_auftakt09.pdf]
